# Supplementary material for: T1-Weighted MR imaging of liver tumor by gadolinium-encapsulated glycol chitosan nanoparticles without non-specific toxicity in normal tissues
Source: Royal Society of Chemistry journal article supplement (doi:10.1039/c5nr06673e), 2016-01-01
Supplement: c5nr06673e1.pdf [file c5nr06673e1.pdf]

## Supplementary Information

### **T1-weighted MR imaging of liver tumor by gadolinium-encapsulated glycol chitosan nanoparticles without non-specific toxicity in normal tissues**

Jin Hee Na,<sup>‡a,b,c</sup> Sangmin Lee,<sup>‡a,b,c</sup> Heebeom Koo,<sup>a</sup> Hyounkoo Han,<sup>a,d</sup> Kyung Eun Lee,<sup>e</sup> Seung Jin Han,<sup>a</sup> Seung Hong Choi,<sup>f</sup> Hyuncheol Kim,<sup>d</sup> Seulki Lee,<sup>b,c</sup> Ick Chan Kwon,<sup>a,g</sup> Kuiwon Choi<sup>\*h</sup> and Kwangmeyung Kim<sup>\*a</sup>

<sup>a</sup> Center for Theragnosis, Biomedical Research Institute, Korea Institute of Science and Technology (KIST), Hwarangno 14-gil 5, Seongbuk-gu, Seoul 136-791, Republic of Korea. E-mail: kim@kist.re.kr

<sup>b</sup> The Russell H. Morgan Department of Radiology and Radiological Science, Johns Hopkins University School of Medicine, 601 N. Caroline Street, Baltimore, MD 21287, USA.

<sup>c</sup> The Center for Nanomedicine, The Wilmer Eye Institute, Johns Hopkins University School of Medicine, 400 N. Broadway, Baltimore, MD 21231, USA.

<sup>d</sup> Department of Chemical and Biomolecular Engineering, Sogang University, 35 Baekbeom-ro, Mapo-gu, Seoul 121-742, Republic of Korea.

<sup>e</sup> Advanced Analysis Center, Korea Institute of Science and Technology (KIST), Hwarangno 14-gil 5, Seongbuk-gu, Seoul 136-791, Republic of Korea.

<sup>f</sup> Department of Radiology, Seoul National University Hospital, 101 Daehak-ro, Jongno-gu, Seoul 110-744, Republic of Korea.

<sup>g</sup> KU-KIST School, Korea University, 1 Anam-dong, Seongbuk-gu, Seoul 136-701, Republic of Korea.

<sup>h</sup> Korea Institute of Science and Technology Europe (KIST-Europe), Forschungsgesellschaft mbH, Campus E7.1, 66123 Saarbrücken, Germany.

\* Address correspondence to K.Kim ([kim@kist.re.kr](mailto:kim@kist.re.kr)) or K.Choi ([choi@kist.re.kr](mailto:choi@kist.re.kr))

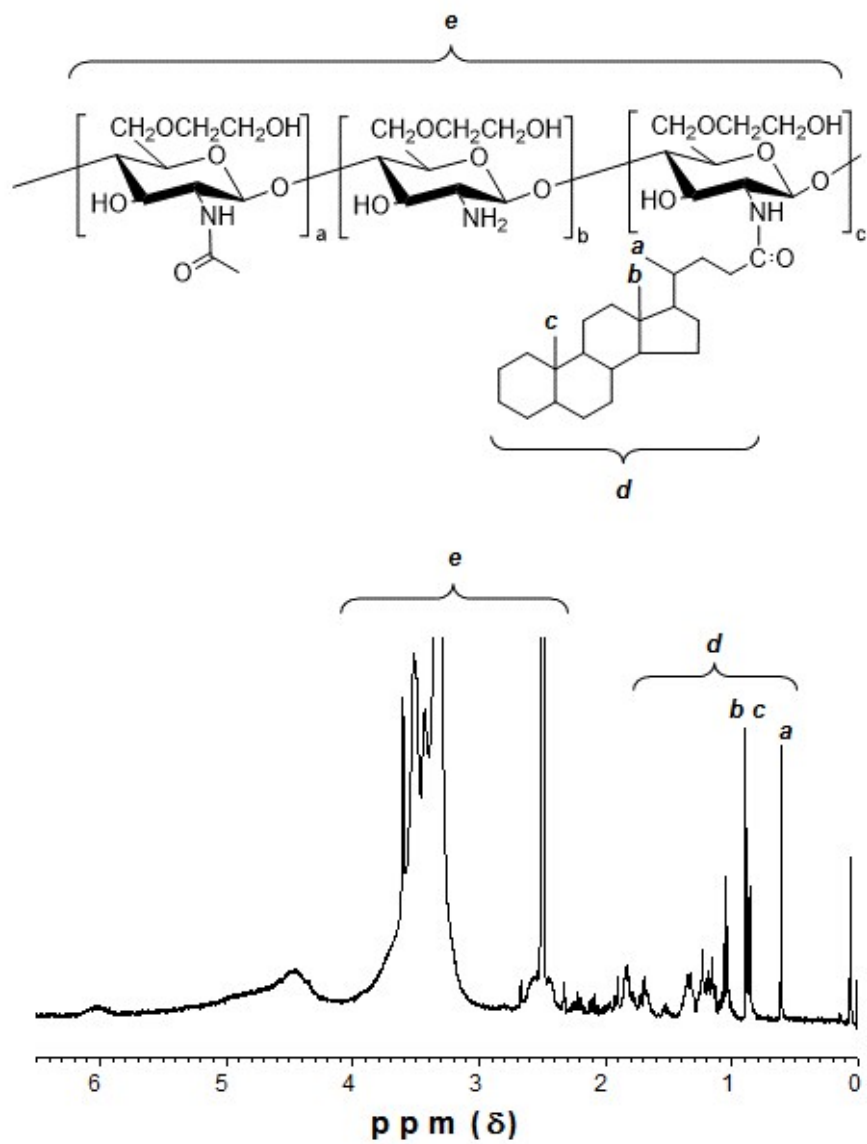

**Fig. S1**  $^1\text{H-NMR}$  spectrum of CNP
